# Supplementary material for: The mechanism and pattern of yolk consumption provide insight into embryonic nutrition in Xenopus
Source: Oxford University Press journal article supplement (doi:10.1242/dev.032425), 2009-04-10
Supplement: dev032425-sup-032425-tables1.pdf [file dev032425-sup-032425-tables1.pdf]

**Table S1. Proteins identified in the membrane and supernatant fractions of purified yolk platelets**

| Identified proteins                | GI number                             | YP membranes or supernatant? | Description                                                                        |
|------------------------------------|---------------------------------------|------------------------------|------------------------------------------------------------------------------------|
| <b>Yolk platelets</b>              |                                       |                              |                                                                                    |
| Vitellogenin A2                    | gij4388696                            | Both                         | Major yolk protein, estrogen inducible (liver)                                     |
| Vitellogenin B1                    | gij33563034                           | Both                         | Major yolk protein, estrogen inducible (liver)                                     |
| <b>Plasma</b>                      |                                       |                              |                                                                                    |
| Ep45                               | gij259142                             | Both                         | Protein found in <i>X. laevis</i> plasma and eggs, estrogen inducible (liver)      |
| MGC64276                           | gij32766455                           | YP membranes                 | Homolog of human complement component C9                                           |
| Pon1-prov                          | gij28422437                           | YP membranes                 | Homolog of paraoxonase, hydrolyzes oxidized lipids in LDL                          |
| MGC82702                           | gij49256138                           | YP supernatant               | Homolog of alpha globin, subunit of hemoglobin                                     |
| LOC448844                          | gij51895923                           | YP supernatant               | Serum albumin                                                                      |
| <b>Lysosome</b>                    |                                       |                              |                                                                                    |
| LOC432087                          | gij71051360                           | YP membranes                 | Predicted alpha-L-1 fucosidase                                                     |
| Manba-prov                         | gij50417768                           | YP supernatant               | Predicted beta-mannosidase                                                         |
| MGC64382, dipeptidyl-peptidase IV  | gij111185523, gij147907306            | YP supernatant               | Dipeptidyl-peptidase IV, serine protease, hydrolyzes N-terminus dipeptides         |
| LOC446948                          | gij71681246                           | YP supernatant               | Predicted galactocerebrosidase                                                     |
| Ctsc-prov                          | gij33417162                           | YP supernatant               | Dipeptidyl aminopeptidase I, cysteine protease, hydrolyzes N-terminus dipeptides   |
| <b>Endoplasmic reticulum</b>       |                                       |                              |                                                                                    |
| LOC495169                          | gij54038199                           | YP membranes                 | Homolog of human ERp72, a protein disulfide isomerase                              |
| Grp58-prov                         | gij28302197                           | Both                         | Homolog of human ERp57, a protein disulfide isomerase, associates with ApoB100     |
| P4hb                               | gij28436918                           | Both                         | Homolog of human PDI, a protein disulfide isomerase                                |
| MGC79068                           | gij50418205                           | YP membranes                 | Homolog of human P5, a protein disulfide isomerase                                 |
| MGC52808, MGC52894                 | gij28277278, gij28175644              | YP membranes                 | Predicted Ribophorin I                                                             |
| MGC53764                           | gij28436786                           | YP membranes                 | Predicted Ribophorin II                                                            |
| MGC84282, LOC495100                | gij49522162, gij54038026              | YP membranes                 | Homolog of human ERLIN2, prohibitin family member                                  |
| MGC68448, heat shock protein gp96  | gij37805387, gij148223467             | YP supernatant               | Predicted Hsp90 chaperone                                                          |
| Hspa5                              | gij27370850                           | Both                         | Nearly identical to <i>X. laevis</i> BiP, Hsp70 chaperone                          |
| <b>Mitochondria</b>                |                                       |                              |                                                                                    |
| MGC82638                           | gij49256557                           | YP membranes                 | Predicted hydroxyacyl-Coenzyme A dehydrogenase                                     |
| Atp5b                              | gij28436792                           | YP membranes                 | Predicted ATP synthase, mitochondrial F1 complex, beta subunit precursor           |
| Atp5a1                             | gij32766606                           | YP membranes                 | Predicted ATP synthase, mitochondrial F1 complex, alpha subunit                    |
| MGC82361, MGC82400, MGC82361       | gij47682284, gij46329495, gij47682284 | YP membranes                 | Predicted ATP synthase, mitochondrial F0 complex, subunit d                        |
| Thiolase-prov                      | gij28280033                           | YP membranes                 | Predicted hydroxyacyl-Coenzyme A dehydrogenase                                     |
| Mitochondrial malate dehydrogenase | gij50882324                           | YP membranes                 | Mitochondrial malate dehydrogenase 2a                                              |
| MGC114756                          | gij62826006                           | YP membranes                 | Predicted voltage-dependent anion-selective channel protein                        |
| MGC79025                           | gij50417418                           | YP membranes                 | Predicted Prohibitin 2                                                             |
| Hspd1, MGC53106                    | gij47938737, gij28436902              | Both                         | Predicted Hsp60 chaperone                                                          |
| <b>Location not classified</b>     |                                       |                              |                                                                                    |
| MGC68676                           | gij37747702                           | YP supernatant               | Predicted phospholipase D3, involved in signalling pathways                        |
| MGC82953                           | gij148228657                          | YP supernatant               | Predicted VAT1, a vesicle amine transport protein                                  |
| MGC81039                           | gij46249838                           | YP membranes                 | Homolog of yeast Yop1, binds to Rab proteins                                       |
| Rheb-prov                          | gij27695152                           | YP membranes                 | Predicted Rheb, GTPase, growth regulator upstream of TOR                           |
| MGC64421                           | gij32450604                           | YP membranes                 | Homolog of human thrombin inhibitor, an intracellular serpin                       |
| <b>Cytoplasm</b>                   |                                       |                              |                                                                                    |
| MGC53952                           | gij28374367                           | Both                         | Nearly identical to <i>X. laevis</i> Hsc70, constitutively expressed Hsp70 protein |
| LOC443576                          | gij48734658                           | YP membranes                 | Predicted inosine monophosphate synthase, de novo purine biosynthesis              |
| Pgm2-prov                          | gij27881782                           | YP membranes                 | Predicted phosphoglucomutase, glycogen metabolism                                  |
| MGC69114                           | gij33585659                           | YP membranes                 | Predicted transketolase, pentose phosphate pathway                                 |
| Cct3-prov                          | gij29477224                           | YP membranes                 | Predicted subunit of CCT chaperonin                                                |

|                         |                             |              |                                                                |
|-------------------------|-----------------------------|--------------|----------------------------------------------------------------|
| Cct8-prov               | gij27924345                 | YP membranes | Predicted subunit of CCT chaperonin                            |
| PKM2                    | gij51258124                 | YP membranes | Predicted pyruvate kinase, glycolysis                          |
| MGC53997                | gij27695233                 | YP membranes | Predicted beta-tubulin                                         |
| Eno1-prov               | gij32450571                 | YP membranes | Predicted enolase, glycolysis                                  |
| MGC64329                | gij32484263                 | YP membranes | Predicted elongation factor 1 gamma                            |
| Actin                   | gij1334642                  | YP membranes | Predicted beta-actin                                           |
| MGC53030                | gij28302293                 | YP membranes | Predicted fructose bisphosphate aldolase                       |
| Ckb-prov                | gij27503418                 | YP membranes | Predicted creatine kinase                                      |
| Gapd-prov               | gij27882192                 | YP membranes | Predicted glyceraldehyde 3-phosphate dehydrogenase, glycolysis |
| NM23                    | gij1655706                  | YP membranes | Nucleoside diphosphate kinase                                  |
| Cofilin-1, Cofilin-2    | gij148232082,<br>gij1168995 | YP membranes | Actin regulation                                               |
| MGC82306                | gij46329492                 | YP membranes | Predicted 40S ribosomal protein S18                            |
| Rpl27-prov              | gij34193964                 | YP membranes | Predicted 60S ribosomal protein L27                            |
| Ferritin heavy chain    | gij33331485                 | YP membranes | Forms iron storage complexes                                   |
| 14-3-3 zeta, Ywhaz-prov | gij1360640,<br>gij27370992  | YP membranes | 14-3-3 protein                                                 |
| Ppib-prov, LOC495270    | gij32484306,<br>gij54261578 | YP membranes | Predicted peptidylprolyl isomerase B                           |

---

The GI number of each identification by the Mascot software and the associated protein name are listed. If the protein has not been assigned a function in *X. laevis*, as in the great majority of cases, BLAST searches were used to assign homologs and predicted functions. When highly similar (>95% amino acid identity) proteins were identified by mass spectrometry, they were assumed to be pseudo-alleles and are listed in the same row, separated by a comma.

---
