# Supplementary figures and images for: The mechanism and pattern of yolk consumption provide insight into embryonic nutrition in Xenopus
Source: Oxford University Press journal article supplement (doi:10.1242/dev.032425), 2009-04-10

**A**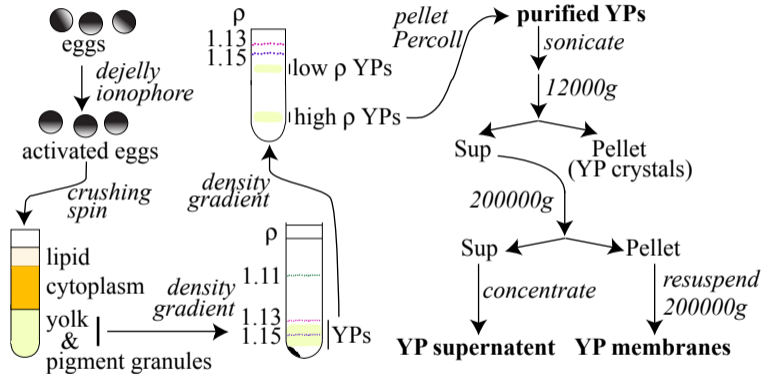**B**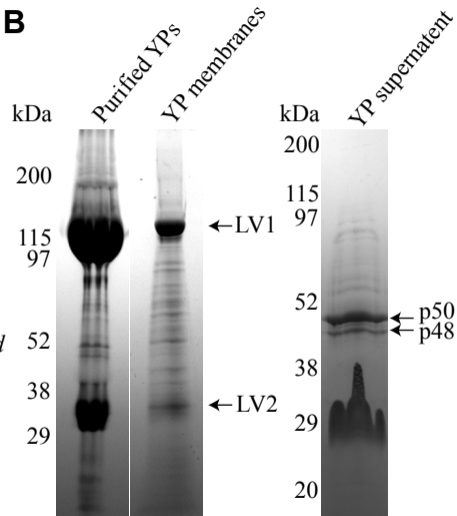

Supplement: dev032425-sup-032425-figs1.pdf [file dev032425-sup-032425-figs1.pdf]

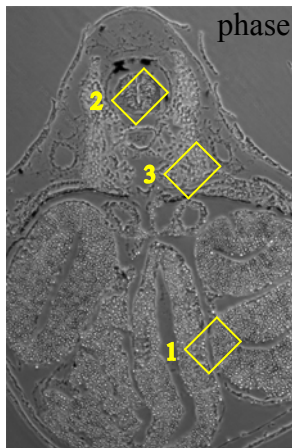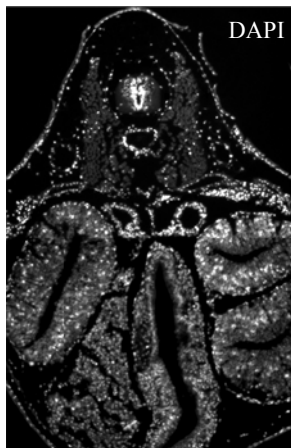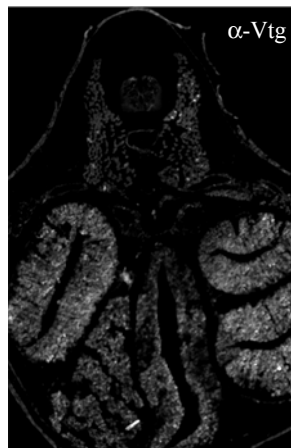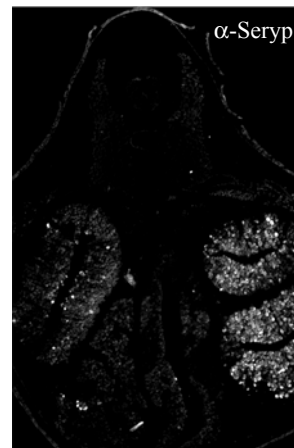

1. gut

2. spinal cord

3. somite

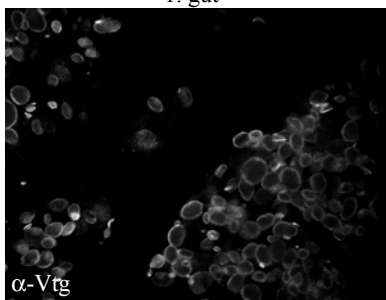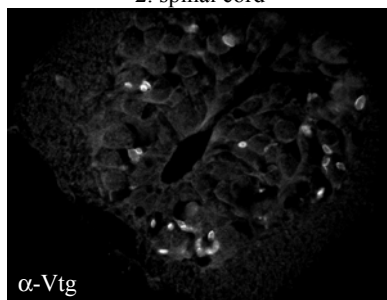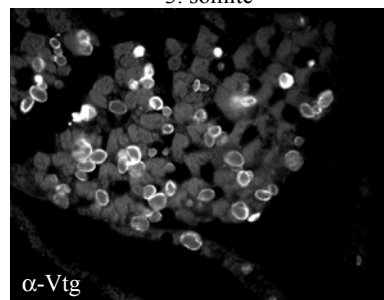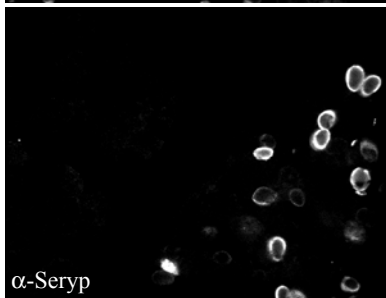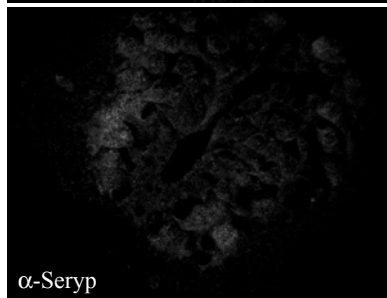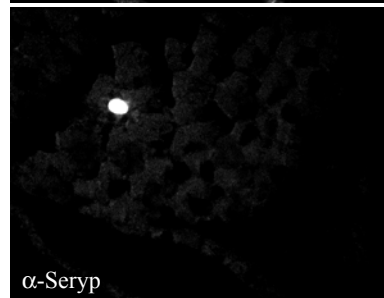

Supplement: dev032425-sup-032425-figs4.pdf [file dev032425-sup-032425-figs4.pdf]
